# Supplementary material for: Characterization of Esophageal Cancer and Its Association with Influencing Factors in Guangzhou City, China
Source: MDPI journal article supplement (doi:10.3390/ijerph17051498), 2020-02-26
Supplement: s1 [file s1]

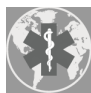

## Supplementary Material:

Table S1 showed the unbalanced development in Guangzhou city for all of the coefficients of variation of influencing factors were greater than 100% except for the aging degree. As far as the medical resources were concerned, almost all of the coefficients of variation of relevant indicators were greater than 100% even in region A, B and C. The health care system was not equally accessible across Guangzhou city.

**Table S1.** The average, the standard deviation and the coefficient of variation of influencing factors in Guangzhou city and region A, B and C on street/town scale.

| Region                       | POP<br>(10 <sup>3</sup> per/km <sup>2</sup> ) | GDP<br>(10 <sup>8</sup> yuan/km <sup>2</sup> ) | Aging degree             | Beds                     | RMIO <sub>TMI</sub>    | RMIO <sub>MMI</sub>    | RMIO <sub>BMI</sub>    | RMIO <sub>all</sub>    |
|------------------------------|-----------------------------------------------|------------------------------------------------|--------------------------|--------------------------|------------------------|------------------------|------------------------|------------------------|
| Region A<br>(N=61)           | 21.54±10.70<br>(49.67%)                       | 36.90±30.51<br>(82.69%)                        | 10.48%±3.18%<br>(30.34%) | 21.18±24.63<br>(116.29%) | 0.14±0.22<br>(157.14%) | 0.37±0.49<br>(132.43%) | 0.34±0.36<br>(105.88%) | 0.85±0.79<br>(92.94%)  |
| Region B<br>(N=54)           | 7.24±6.58<br>(90.94%)                         | 11.88±11.14<br>(93.73%)                        | 5.01%±2.23%<br>(44.51%)  | 8.12±11.86<br>(146.06%)  | 0.04±0.09<br>(225.00%) | 0.20±0.27<br>(135.00%) | 0.20±0.27<br>(135.00%) | 0.43±0.44<br>(102.32%) |
| Region C<br>(N=55)           | 2.53±2.27<br>(89.52%)                         | 2.98±3.37<br>(113.13%)                         | 5.66%±2.57%<br>(45.41%)  | 8.93±17.67<br>(197.87%)  | 0.04±0.10<br>(250.00%) | 0.24±0.68<br>(283.33%) | 0.17±0.17<br>(100.00%) | 0.45±0.84<br>(186.67%) |
| Guangzhou<br>city<br>(N=170) | 10.85±11.12<br>(102.46%)                      | 17.98±24.30<br>(135.12%)                       | 7.18%±3.67%<br>(51.11%)  | 13.07±20.00<br>(153.02%) | 0.07±0.16<br>(228.57%) | 0.28±0.51<br>(182.14%) | 0.24±0.29<br>(120.83%) | 0.59±0.74<br>(125.42%) |

Note: POP: population density; GDP: gross domestic product density; Beds: hospital beds per 1,000; RMIO<sub>TMI</sub>: rate of medical institutions occupancy (RMIO) per 10,000 for top medical institutions; RMIO<sub>MMI</sub>: RMIO for middle medical institutions; RMIO<sub>BMI</sub>: RMIO for basic medical institutions; RMIO<sub>all</sub>: RMIO for all medical institutions. The values in each grid was shown as average ± standard deviation (coefficient of variation).  $Coefficient\ of\ variations = \frac{standard\ deviation}{average} * 100\%$ . The variable shows strong variations when its coefficient of variation is greater than 100%.

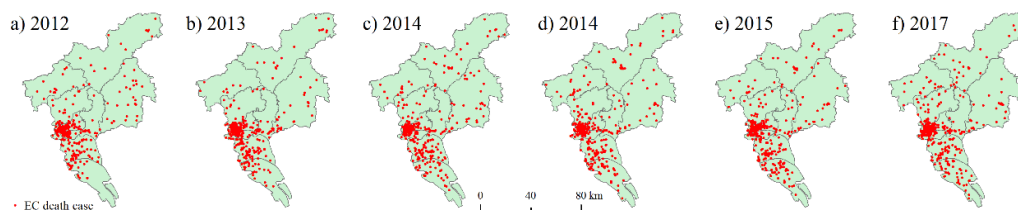

**Figure S1.** Spatial distribution of EC death cases in each year during 2012-2017.
